# Supplementary material
Source: MDPI journal article supplement (https://www.mdpi.com/1424-2818/15/6/712)
Supplement: s1 [file s1]

**Riparian bird occupancy in a mountain watershed in the Colorado Mineral Belt appears resilient to climate-change driven increases in metals and rare earth elements in water and aquatic macroinvertebrates, Watson and McKnight**

**Supplementary files**

Table S1. Trace metal concentrations in water, CCU, pH, and specific conductance at all study sites. DL denotes a concentration below the ICP-MS detection limit. Shading differentiates the study sites, some of which were sampled on two different days. Data were collected in July 2017.

| Sample Name | pH   | Specific conductance (µS) | Hardness (mg/L as CaCO <sub>3</sub> ) | Al (µg/L) | Cd (µg/L) | Cu (µg/L) | Fe (µg/L) | Mn (µg/L) | Ni (µg/L) | Pb (µg/L) | Zn (µg/L) | CCU   |
|-------------|------|---------------------------|---------------------------------------|-----------|-----------|-----------|-----------|-----------|-----------|-----------|-----------|-------|
| D1 7/17     | 7.66 | 41.9                      | 17.6                                  | 6.99      | DL        | 2.46      | 76.4      | 5.12      | 0.607     | 0.014     | 6.90      | 0.335 |
| D1 7/24     | 7.69 | 47.0                      | 19.8                                  | 5.41      | 0.013     | 0.252     | 97.0      | 8.56      | 0.428     | 0.021     | 5.68      | 0.182 |
| D2 7/17     | 7.92 | 46.8                      | 20.7                                  | 6.57      | DL        | 1.78      | 95.6      | 5.93      | 0.505     | 0.018     | 3.68      | 0.275 |
| D3 7/17     | 7.94 | 57.4                      | 24.3                                  | 6.48      | DL        | 0.802     | 100       | 5.53      | 0.579     | 0.018     | 5.48      | 0.219 |
| D3 7/24     | 8.05 | 63.4                      | 26.9                                  | 8.85      | 0.007     | 0.167     | 124       | 7.08      | 0.687     | 0.014     | 2.09      | 0.174 |
| D4 7/17     | 7.97 | 62.5                      | 27.1                                  | 9.69      | DL        | 1.32      | 112       | 6.42      | 0.802     | 0.053     | 10.5      | 0.319 |
| D4 7/24     | 8.05 | 69.5                      | 29.8                                  | 6.82      | 0.012     | 0.391     | 124       | 8.00      | 0.803     | 0.053     | 3.48      | 0.204 |
| D5 7/17     | 8.01 | 63.6                      | 27.3                                  | 8.41      | 0.010     | 0.611     | 114       | 60.2      | 0.719     | 0.096     | 3.59      | 0.229 |
| US1 7/20    | 3.13 | 190                       | 32.7                                  | 3177      | 0.757     | 6.07      | 2329      | 395       | 15.1      | 0.508     | 164       | 8.98  |
| US1 7/26    | 3.16 | 212                       | 36.5                                  | 3487      | 0.831     | 5.68      | 2508      | 461       | 16.9      | 0.596     | 182       | 9.76  |
| US3 7/20    | 3.19 | 195                       | 34.0                                  | 3944      | 1.06      | 19.3      | 1870      | 567       | 16.6      | 0.505     | 245       | 11.5  |
| US3 7/26    | 3.23 | 214                       | 33.8                                  | 3880      | 1.05      | 17.2      | 1706      | 514       | 17.0      | 0.607     | 247       | 11.0  |
| US4 7/20    | 3.20 | 271                       | 52.3                                  | 7295      | 5.25      | 32.9      | 1696      | 1814      | 31.2      | 0.932     | 1007      | 25.9  |
| US4 7/26    | 3.05 | 287                       | 55.9                                  | 7803      | 5.55      | 31.9      | 1775      | 1875      | 33.0      | 1.14      | 1026      | 26.9  |
| LS1 7/17    | 4.89 | 127                       | 39.6                                  | 927       | 2.33      | 13.4      | 519       | 737       | 13.6      | 0.391     | 414       | 7.78  |
| LS1 7/24    | 4.93 | 142                       | 43.0                                  | 1222      | 2.61      | 14.2      | 498       | 877       | 15.5      | 0.480     | 477       | 8.95  |
| LS3 7/17    | 4.99 | 128                       | 39.9                                  | 804       | 2.05      | 11.3      | 467       | 633       | 11.9      | 0.376     | 399       | 7.09  |
| LS5 7/24    | 7.36 | 148                       | 53.0                                  | 78.9      | 2.09      | 2.21      | 207       | 665       | 10.3      | 0.073     | 463       | 5.73  |
| P1 7/20     | 4.38 | 217                       | 69.4                                  | 2934      | 6.89      | 68.7      | 592       | 1837      | 20.1      | 4.73      | 1558      | 27.3  |
| P1 7/26     | 4.31 | 230                       | 74.4                                  | 3398      | 7.26      | 74.8      | 682       | 1926      | 21.5      | 5.64      | 1698      | 29.9  |
| P2 7/20     | 5.24 | 170                       | 58.8                                  | 647       | 4.28      | 41.0      | 355       | 1122      | 12.9      | 2.79      | 1001      | 15.5  |
| P2 7/26     | 5.24 | 176                       | 61.7                                  | 698       | 4.35      | 41.9      | 368       | 1129      | 13.4      | 3.12      | 1018      | 15.8  |
| P4 7/20     | 5.23 | 167                       | 56.8                                  | 533       | 4.12      | 39.3      | 302       | 1054      | 12.2      | 2.95      | 1002      | 15.1  |
| P4 7/26     | 5.27 | 174                       | 60.1                                  | 625       | 4.31      | 41.6      | 358       | 1091      | 12.8      | 3.41      | 1055      | 16.0  |

Table S2. Rare earth element concentrations (all in µg/L) in water samples for all study sites. DL denotes a concentration below the ICP-MS detection limit. Shading differentiates the study sites, some of which were sampled on two different days. Data were collected in July 2017.

| Sample Name | Ce    | Dy    | Er    | Eu    | Gd    | Ho    | La    | Lu    | Nd    | Pr    | Sc    | Sm    | Tb    | Tm    | Y     | Yb    |
|-------------|-------|-------|-------|-------|-------|-------|-------|-------|-------|-------|-------|-------|-------|-------|-------|-------|
| D1 7/17     | 0.028 | 0.002 | DL    | 0.004 | DL    | DL    | 0.038 | DL    | 0.043 | 0.007 | 0.466 | 0.017 | DL    | DL    | 0.037 | DL    |
| D1 7/24     | 0.026 | 0.002 | DL    | 0.006 | 0.007 | DL    | 0.036 | DL    | 0.042 | 0.006 | 0.509 | 0.015 | DL    | DL    | 0.036 | DL    |
| D2 7/17     | 0.031 | 0.003 | DL    | 0.008 | 0.011 | DL    | 0.041 | DL    | 0.050 | 0.008 | 0.496 | 0.017 | DL    | DL    | 0.042 | DL    |
| D3 7/17     | 0.024 | 0.006 | DL    | 0.006 | DL    | DL    | 0.035 | DL    | 0.042 | 0.008 | 0.493 | 0.021 | DL    | DL    | 0.036 | DL    |
| D3 7/24     | 0.028 | 0.006 | 0.00  | 0.009 | 0.009 | DL    | 0.046 | DL    | 0.044 | 0.011 | 0.628 | 0.021 | DL    | DL    | 0.041 | DL    |
| D4 7/17     | 0.024 | 0.004 | DL    | 0.007 | 0.007 | DL    | 0.036 | DL    | 0.039 | 0.007 | 0.699 | 0.016 | DL    | DL    | 0.041 | DL    |
| D4 7/24     | 0.025 | 0.004 | DL    | 0.008 | DL    | DL    | 0.033 | DL    | 0.034 | 0.008 | 0.682 | 0.019 | DL    | DL    | 0.038 | DL    |
| D5 7/17     | 0.023 | 0.004 | DL    | 0.008 | 0.009 | DL    | 0.030 | DL    | 0.040 | 0.006 | 0.741 | 0.016 | DL    | DL    | 0.041 | DL    |
| US1 7/20    | 1.91  | 0.410 | 0.242 | 0.088 | 0.452 | 0.082 | 0.818 | 0.021 | 1.22  | 0.257 | 2.09  | 0.287 | 0.066 | 0.025 | 3.38  | 0.187 |
| US1 7/26    | 2.13  | 0.475 | 0.290 | 0.101 | 0.541 | 0.097 | 0.912 | 0.025 | 1.39  | 0.300 | 2.21  | 0.325 | 0.078 | 0.033 | 3.86  | 0.229 |
| US3 7/20    | 3.13  | 0.733 | 0.417 | 0.142 | 0.901 | 0.140 | 1.18  | 0.036 | 2.49  | 0.482 | 2.33  | 0.612 | 0.128 | 0.046 | 5.49  | 0.310 |
| US3 7/26    | 3.15  | 0.771 | 0.426 | 0.141 | 0.911 | 0.152 | 1.23  | 0.037 | 2.41  | 0.480 | 2.25  | 0.583 | 0.135 | 0.050 | 5.77  | 0.311 |
| US4 7/20    | 8.27  | 1.95  | 1.03  | 0.387 | 2.55  | 0.370 | 3.90  | 0.095 | 8.26  | 1.70  | 2.49  | 1.80  | 0.370 | 0.124 | 13.1  | 0.732 |
| US4 7/26    | 8.62  | 2.04  | 1.11  | 0.419 | 2.70  | 0.393 | 4.11  | 0.097 | 8.38  | 1.76  | 2.74  | 1.86  | 0.372 | 0.131 | 14.1  | 0.771 |
| LS1 7/17    | 3.14  | 0.705 | 0.391 | 0.148 | 0.994 | 0.139 | 1.55  | 0.027 | 3.06  | 0.634 | 1.56  | 0.649 | 0.131 | 0.041 | 4.98  | 0.277 |
| LS1 7/24    | 3.77  | 0.919 | 0.492 | 0.184 | 1.20  | 0.176 | 1.89  | 0.040 | 3.77  | 0.781 | 1.65  | 0.833 | 0.168 | 0.055 | 6.18  | 0.350 |
| LS3 7/17    | 2.70  | 0.612 | 0.337 | 0.128 | 0.821 | 0.119 | 1.35  | 0.025 | 2.68  | 0.536 | 1.45  | 0.572 | 0.116 | 0.034 | 4.32  | 0.224 |
| LS5 7/24    | 0.523 | 0.046 | 0.027 | 0.018 | 0.092 | 0.006 | 0.40  | DL    | 0.398 | 0.087 | 1.41  | 0.074 | 0.007 | DL    | 0.501 | 0.013 |
| P1 7/20     | 10.5  | 1.88  | 0.977 | 0.475 | 2.86  | 0.351 | 5.95  | 0.087 | 10.1  | 2.18  | 1.47  | 2.01  | 0.385 | 0.109 | 11.9  | 0.638 |
| P1 7/26     | 12.0  | 2.09  | 1.08  | 0.559 | 3.24  | 0.386 | 6.73  | 0.100 | 11.2  | 2.42  | 1.58  | 2.29  | 0.433 | 0.123 | 13.0  | 0.705 |
| P2 7/20     | 6.29  | 1.10  | 0.562 | 0.288 | 1.69  | 0.203 | 3.72  | 0.047 | 5.91  | 1.31  | 1.23  | 1.17  | 0.227 | 0.063 | 7.08  | 0.378 |
| P2 7/26     | 6.77  | 1.18  | 0.603 | 0.308 | 1.81  | 0.219 | 3.86  | 0.050 | 6.45  | 1.38  | 1.17  | 1.29  | 0.236 | 0.063 | 7.44  | 0.389 |
| P4 7/20     | 6.06  | 1.02  | 0.529 | 0.259 | 1.58  | 0.187 | 3.59  | 0.046 | 5.76  | 1.24  | 1.15  | 1.11  | 0.207 | 0.056 | 6.77  | 0.353 |
| P4 7/26     | 6.82  | 1.13  | 0.584 | 0.306 | 1.73  | 0.213 | 3.92  | 0.053 | 6.31  | 1.38  | 1.37  | 1.24  | 0.229 | 0.063 | 7.43  | 0.377 |

Table S1. Mass and sampling effort for benthic macroinvertebrate samples.

| <b>Combined Samples</b> | <b>Number of Surber Samples</b>        | <b>Total Mass (mg)</b> |
|-------------------------|----------------------------------------|------------------------|
| D1 7/17 and 7/24        | 2 on 7/17; 1 on 7/24                   | 52.1                   |
| D2 7/17                 | 1                                      | 27.0                   |
| D3 7/17                 | 1                                      | 38.1                   |
| D3 7/24                 | 1                                      | 34.8                   |
| D4 7/17 and 7/24        | 1 each day                             | 97.6                   |
| D5 7/17                 | 1                                      | 47.7                   |
| US1 7/20 and 7/26       | 2 on 7/20, 1 on 7/26                   | 19.8                   |
| US3 7/20 and 7/26       | 1 each day                             | 14.9                   |
| US4 7/20 and 7/26       | 1 each day                             | 59.3                   |
| LS1 7/17 and 7/24       | 1 each day                             | 10.7                   |
| LS3 7/17                | 1                                      | 5.3                    |
| LS5 7/24                | 1 (no invertebrates)                   | n/a                    |
| P1 7/20 and 7/26        | 1 each day                             | 33.8                   |
| P4 7/20                 | 1 on 7/20;<br>no invertebrates on 7/26 | 7.9                    |

Table S4. Trace metal concentrations (all in  $\mu\text{g} / \text{g}$  dry mass) in benthic macroinvertebrates for all samples. DL denotes a concentration below the ICP-MS detection limit. Data were collected in July 2017.

| Sample Name  | Al    | Cd    | Cu   | Fe    | Mn   | Ni   | Pb   | Zn   |
|--------------|-------|-------|------|-------|------|------|------|------|
| D1 combined  | 2133  | 2.68  | 52.2 | 3167  | 146  | 5.00 | 13.2 | 250  |
| D2 7/17      | 2034  | 0.489 | 35.9 | 1835  | 129  | 3.53 | 3.91 | 138  |
| D3 7/17      | 4573  | 1.40  | 28.8 | 6962  | 489  | 6.63 | 15.4 | 171  |
| D3 7/24      | 2756  | 1.19  | 28.7 | 3943  | 311  | 3.88 | 9.91 | 131  |
| D4 combined  | 2430  | 3.24  | 24.3 | 3201  | 271  | 3.14 | 13.3 | 269  |
| D5 7/17      | 3600  | 4.12  | 35.7 | 5587  | 438  | 5.06 | 30.4 | 358  |
| US1 combined | 4177  | DL    | 46.0 | 34916 | 36.7 | 3.90 | 21.4 | 84.4 |
| US3 combined | 8719  | DL    | 83.5 | 31148 | 70.6 | 6.44 | 41.0 | 108  |
| US4 combined | 6653  | 0.460 | 54.7 | 16737 | 112  | 3.81 | 35.0 | 162  |
| LS1 combined | 8058  | 1.97  | 108  | 5486  | 1106 | 11.3 | 23.3 | 303  |
| LS3 7/17     | 10474 | 1.18  | 191  | 3743  | 154  | 11.6 | 20.1 | 239  |
| P1 combined  | 747.0 | 0.233 | 30.6 | 1458  | 130  | 2.60 | 3.08 | 78.2 |
| P4 7/20      | 3811  | 0.544 | 112  | 3239  | 157  | 9.49 | 13.7 | 450  |

Table S5. Rare earth element concentrations (all in  $\mu\text{g} / \text{g}$  dry mass) in benthic macroinvertebrates for all samples. DL denotes a concentration below the ICP-MS detection limit. Data were collected in July 2017.

| Sample Name  | Ce   | Dy    | Er    | Eu    | Gd    | Ho    | La   | Lu    | Nd   | Pr    | Sc   | Sm    | Tb    | Tm    | Y     | Yb    |
|--------------|------|-------|-------|-------|-------|-------|------|-------|------|-------|------|-------|-------|-------|-------|-------|
| D1 combined  | 12.3 | 1.01  | 0.652 | 0.306 | 4.10  | 0.140 | 8.43 | 0.040 | 7.27 | 1.93  | DL   | 1.43  | 0.371 | 0.043 | 4.67  | 0.365 |
| D2 7/17      | 2.62 | 0.388 | 0.261 | 0.141 | 1.48  | 0.054 | 1.77 | 0.034 | 1.87 | 0.464 | 5.59 | 0.484 | 0.128 | DL    | 1.39  | 0.188 |
| D3 7/17      | 10.2 | 1.22  | 0.827 | 0.491 | 5.66  | 0.156 | 6.47 | 0.077 | 6.63 | 1.60  | 8.38 | 1.72  | 0.475 | 0.061 | 3.97  | 0.504 |
| D3 7/24      | 6.53 | 0.788 | 0.545 | 0.261 | 3.57  | 0.102 | 4.03 | 0.053 | 4.25 | 1.03  | 6.74 | 1.01  | 0.295 | 0.038 | 2.61  | 0.307 |
| D4 combined  | 4.64 | 0.563 | 0.385 | 0.211 | 2.45  | 0.076 | 2.94 | 0.037 | 3.08 | 0.760 | 6.62 | 0.765 | 0.215 | 0.030 | 1.88  | 0.226 |
| D5 7/17      | 10.8 | 1.06  | 0.748 | 0.396 | 5.70  | 0.123 | 6.62 | 0.065 | 6.89 | 1.79  | 5.53 | 1.60  | 0.453 | 0.048 | 3.07  | 0.376 |
| US1 combined | 5.18 | 0.507 | 0.335 | 0.252 | 2.45  | 0.080 | 2.55 | 0.080 | 2.44 | 0.631 | 8.10 | 0.725 | 0.189 | DL    | 1.67  | 0.248 |
| US3 combined | 10.8 | 1.09  | 0.775 | 0.525 | 4.97  | 0.157 | 4.76 | 0.101 | 5.80 | 1.38  | 13.2 | 1.65  | 0.400 | DL    | 3.30  | 0.478 |
| US4 combined | 14.0 | 1.27  | 0.853 | 0.487 | 6.53  | 0.157 | 6.13 | 0.076 | 7.87 | 1.90  | 7.96 | 1.92  | 0.498 | 0.065 | 3.52  | 0.477 |
| LS1 combined | 7.15 | 1.58  | 0.959 | 0.515 | 4.78  | 0.265 | 4.73 | 0.252 | 6.24 | 1.53  | 16.3 | 1.75  | 0.557 | 0.161 | 6.05  | 0.721 |
| LS3 7/17     | 4.37 | 1.39  | 0.928 | 0.441 | 3.39  | 0.260 | 1.97 | 0.365 | 4.79 | 0.977 | 17.9 | 1.43  | 0.465 | 0.238 | 4.99  | 0.778 |
| P1 combined  | 1.07 | 0.131 | 0.089 | 0.062 | 0.601 | DL    | 0.50 | 0.066 | 0.65 | 0.173 | 3.37 | 0.181 | 0.058 | 0.030 | 0.381 | 0.094 |
| P4 7/20      | 3.51 | 0.697 | 0.472 | 0.266 | 2.34  | DL    | 1.81 | 0.200 | 2.74 | 0.661 | 11.3 | 0.767 | 0.263 | DL    | 2.28  | 0.409 |

Table S6. Moran's I values and the corresponding p value for dissolved trace metals, rare earth elements, CCU, pH, and specific conductance.

| Analyte                   | Moran's I Value | P Value  |
|---------------------------|-----------------|----------|
| Tb                        | -0.119          | 0.267078 |
| Er                        | -0.112          | 0.262369 |
| Ho                        | -0.150          | 0.114718 |
| Yb                        | -0.158          | 0.086895 |
| Lu                        | -0.206          | 0.026859 |
| Tm                        | -0.218          | 0.016811 |
| Gd                        | 0.0920          | 0.011333 |
| Cd (µg/L)                 | 0.101           | 0.005379 |
| Al (µg/L)                 | 0.0874          | 0.002977 |
| Dy                        | 0.120           | 3.96E-04 |
| Y                         | 0.121           | 3.73E-04 |
| Sm                        | 0.135           | 1.05E-04 |
| Ni (µg/L)                 | 0.139           | 6.83E-05 |
| Mn (µg/L)                 | 0.145           | 4.72E-05 |
| Nd                        | 0.151           | 2.51E-05 |
| CCU                       | 0.153           | 2.08E-05 |
| Eu                        | 0.153           | 1.91E-05 |
| Pr                        | 0.157           | 1.34E-05 |
| Fe (µg/L)                 | 0.159           | 9.04E-06 |
| Ce                        | 0.168           | 4.25E-06 |
| pH                        | 0.188           | 9.28E-07 |
| Sc                        | 0.191           | 4.63E-07 |
| La                        | 0.192           | 2.62E-07 |
| Specific conductance (µS) | 0.203           | 1.19E-07 |
| Cu (µg/L)                 | 0.215           | 8.81E-09 |
| Zn (µg/L)                 | 0.224           | 6.46E-09 |
| Pb (µg/L)                 | 0.243           | 1.05E-10 |

Table S7. Moran's I values and the corresponding p value for trace metal and rare earth element concentrations in benthic macroinvertebrates.

| Analyte | Moran's I Value | P Value     |
|---------|-----------------|-------------|
| Y       | -0.0895         | 0.928729422 |
| Nd      | -0.0905         | 0.919428261 |
| Ce      | -0.0739         | 0.89437686  |
| La      | -0.0953         | 0.864372941 |
| Pr      | -0.0968         | 0.849342166 |
| Sc      | -0.0531         | 0.653523634 |
| Er      | -0.0505         | 0.639935249 |
| Dy      | -0.0490         | 0.622732511 |
| Sm      | -0.0482         | 0.619692349 |
| Gd      | -0.0485         | 0.619495265 |
| Tb      | -0.0482         | 0.617955779 |
| Zn      | -0.0459         | 0.581707574 |
| Tm      | -0.0368         | 0.468012037 |
| Cd      | -0.0257         | 0.466571689 |
| Yb      | -0.0295         | 0.428513202 |
| Ni      | -0.0198         | 0.354507443 |
| Mn      | -0.0344         | 0.33910356  |
| Eu      | -0.0153         | 0.334129718 |
| Ho      | 0.00498         | 0.260768852 |
| Cu      | 0.01219         | 0.113297834 |
| Al      | 0.0403          | 0.072659115 |
| Lu      | 0.0475          | 0.033509945 |
| Pb      | 0.116           | 0.00367804  |
| Fe      | 0.125           | 0.001009911 |

Table S8. Summary of the dominant benthic invertebrates in the Snake River watershed and their functional feeding groups

| Sites       | Date                                                                                                                                                                                        |                                                                                                                                                                                                                                  |                                                                                                                                                                            |                                                   |
|-------------|---------------------------------------------------------------------------------------------------------------------------------------------------------------------------------------------|----------------------------------------------------------------------------------------------------------------------------------------------------------------------------------------------------------------------------------|----------------------------------------------------------------------------------------------------------------------------------------------------------------------------|---------------------------------------------------|
|             | August 1980 & 1981<br>(McKnight & Feder, 1984)                                                                                                                                              | May & October 1995<br>(W. H. Clements, unpublished data)                                                                                                                                                                         | June-August 2006<br>(Yang, C. MS thesis)                                                                                                                                   | July 2017<br>This study                           |
| Upper Snake | <b>Abundant</b><br>Stonefly: <i>Zapada haysii</i> (shredder-detritivore)<br><b>Sparse</b><br>Chironomids: <i>Diamesa latitarsis</i> , <i>Eukiefferiella Bavarica</i> (collectors-gatherers) | Not sampled                                                                                                                                                                                                                      | <b>Abundant</b><br>Stonefly: <i>Zapada haysii</i> , 90%, <i>Podomosta</i> sp.                                                                                              | <b>Abundant</b><br>Stonefly: <i>Zapada haysii</i> |
| Deer Creek  | <b>Abundant</b><br>Mayflies: <i>Baetis</i> sp., <i>Cinygmula</i> sp., <i>Epeorus grandis</i> , Stonefly of the family Chloroperlidae. (collectors-gatherers/scrapers)                       | <b>Abundant</b><br>Mayflies & caddiflies: <i>Baetis</i> sp., Ephemereididae, Heptageniidae, Rhyacophillidae<br><b>Sparse</b><br>Stoneflies: <i>Zapada</i> sp, <i>Sweltza</i> sp., <i>Isoperla</i> sp. and <i>Paraleuctra</i> sp. | <b>Abundant</b><br><i>Baetid mayflies</i> (60-90%)<br><b>Sparse</b><br>Stoneflies: <i>Zapada</i> sp, <i>Skwala</i> sp., <i>Hesperoperla</i> sp. and <i>Paraleuctra</i> sp. | <b>Abundant</b><br><i>Baetid mayflies</i>         |
| Lower Snake | <b>Sparse</b><br>Stonefly: <i>Zapada haysii</i>                                                                                                                                             | <b>Sparse</b><br>Stonefly: <i>Zapada</i> sp. Chironomids and caddisflies                                                                                                                                                         | <b>Sparse</b><br>Stonefly: <i>Zapada haysii</i> , <i>Alloperla</i> sp.                                                                                                     | <b>Sparse</b><br>Stonefly: <i>Zapada haysii</i>   |
| Peru Creek  | Not sampled                                                                                                                                                                                 | <b>Sparse</b><br>Chironomids and caddisflies                                                                                                                                                                                     | Not sampled                                                                                                                                                                | <b>Sparse</b><br>Stonefly: <i>Zapada haysii</i>   |

Table S9. Loadings of dissolved metal and REE concentrations in water samples on PC1 and PC2. Note that metals with any concentrations below the ICP-MS detection limits were not included in the PCA.

| <b>Metal</b> | <b>PC1</b> | <b>PC2</b> |
|--------------|------------|------------|
| Al           | 0.1737     | -0.4285    |
| Cd           | 0.2517     | 0.1198     |
| Ce           | 0.2578     | 0.0684     |
| Cu           | 0.2410     | 0.1950     |
| Dy           | 0.2576     | -0.0367    |
| Er           | 0.2567     | -0.0627    |
| Eu           | 0.2579     | 0.0626     |
| Fe           | 0.0908     | -0.5367    |
| La           | 0.2521     | 0.1429     |
| Mn           | 0.2555     | -0.0034    |
| Nd           | 0.2568     | 0.0865     |
| Ni           | 0.2253     | -0.2933    |
| Pb           | 0.2117     | 0.2930     |
| Pr           | 0.2560     | 0.1004     |
| Sc           | 0.1615     | -0.4626    |
| Sm           | 0.2580     | 0.0475     |
| Y            | 0.2557     | -0.0820    |
| Zn           | 0.2470     | 0.1710     |



Table S10. Loadings of metal and REE concentrations in invertebrate samples on PC1 and PC2. Note that metals with any concentrations below the ICP-MS detection limits were not included in the PCA.

| <b>Metal</b> | <b>PC1</b> | <b>PC2</b> |
|--------------|------------|------------|
| Al           | -0.2201    | 0.2069     |
| Ce           | -0.2125    | -0.3216    |
| Cu           | -0.1351    | 0.3978     |
| Dy           | -0.2846    | 0.0520     |
| Er           | -0.2857    | 0.0324     |
| Eu           | -0.2780    | -0.0153    |
| Fe           | -0.0435    | -0.1388    |
| Gd           | -0.2555    | -0.2066    |
| La           | -0.1948    | -0.3174    |
| Lu           | -0.1334    | 0.4282     |
| Mn           | -0.1363    | 0.0935     |
| Nd           | -0.2601    | -0.1928    |
| Ni           | -0.1793    | 0.3680     |
| Pb           | -0.2081    | -0.1139    |
| Pr           | -0.2458    | -0.2308    |
| Sm           | -0.2807    | -0.1073    |
| Tb           | -0.2859    | -0.0069    |
| Y            | -0.2632    | 0.0928     |
| Yb           | -0.2547    | 0.2236     |
| Zn           | -0.0926    | 0.1665     |

Table S11. Abundance histories for the America robin, dark-eyed junco, Lincoln's sparrow, and mountain chickadee. The values refer to the number of birds detected at each site during the specified visit. Values greater than 1 were changed to 1 for use in occupancy modeling. Shading indicates sites where no individuals were detected during any of the three visits (i.e. 000 detection history).

| Site | American Robin |         |         | Dark-eyed Junco |         |         | Lincoln's Sparrow |         |         | Mountain Chickadee |         |         |
|------|----------------|---------|---------|-----------------|---------|---------|-------------------|---------|---------|--------------------|---------|---------|
|      | Visit 1        | Visit 2 | Visit 3 | Visit 1         | Visit 2 | Visit 3 | Visit 1           | Visit 2 | Visit 3 | Visit 1            | Visit 2 | Visit 3 |
| D1   | 0              | 1       | 1       | 1               | 1       | 0       | 1                 | 1       | 2       | 1                  | 0       | 2       |
| D2   | 1              | 1       | 1       | 1               | 2       | 0       | 0                 | 0       | 1       | 0                  | 0       | 2       |
| D3   | 1              | 0       | 0       | 0               | 1       | 1       | 1                 | 1       | 2       | 1                  | 2       | 2       |
| D4   | 2              | 0       | 1       | 0               | 2       | 0       | 0                 | 1       | 2       | 1                  | 1       | 0       |
| D5   | 1              | 0       | 0       | 2               | 0       | 0       | 0                 | 0       | 0       | 1                  | 1       | 0       |
| US1  | 1              | 0       | 1       | 1               | 2       | 1       | 0                 | 0       | 1       | 2                  | 2       | 0       |
| US2  | 0              | 0       | 1       | 0               | 1       | 1       | 0                 | 0       | 0       | 1                  | 1       | 0       |
| US3  | 0              | 0       | 0       | 0               | 0       | 0       | 0                 | 0       | 0       | 1                  | 1       | 0       |
| US4  | 2              | 0       | 0       | 0               | 0       | 1       | 1                 | 1       | 1       | 1                  | 1       | 0       |
| US5  | 1              | 1       | 2       | 0               | 1       | 0       | 0                 | 0       | 0       | 2                  | 2       | 1       |
| LS1  | 0              | 0       | 2       | 0               | 0       | 0       | 0                 | 2       | 1       | 2                  | 1       | 0       |
| LS2  | 1              | 0       | 0       | 1               | 0       | 0       | 0                 | 1       | 2       | 0                  | 0       | 0       |
| LS3  | 0              | 1       | 0       | 0               | 1       | 1       | 0                 | 1       | 2       | 0                  | 0       | 0       |
| LS4  | 0              | 0       | 0       | 2               | 1       | 1       | 0                 | 0       | 0       | 1                  | 1       | 1       |
| LS5  | 0              | 0       | 0       | 0               | 0       | 0       | 0                 | 0       | 0       | 2                  | 1       | 1       |
| P1   | 1              | 1       | 0       | 0               | 1       | 1       | 2                 | 1       | 1       | 0                  | 1       | 0       |
| P2   | 0              | 1       | 1       | 1               | 0       | 1       | 0                 | 0       | 0       | 1                  | 0       | 0       |
| P3   | 0              | 0       | 1       | 0               | 0       | 0       | 2                 | 2       | 3       | 0                  | 0       | 0       |
| P4   | 1              | 1       | 1       | 0               | 2       | 1       | 0                 | 0       | 0       | 0                  | 1       | 1       |
| P5   | 0              | 0       | 0       | 1               | 0       | 0       | 0                 | 0       | 0       | 0                  | 0       | 0       |





Table S14. Moran's I value and the corresponding p value for abundance histories of bird species.

| Birds                 | Moran's I Value | P Value  |
|-----------------------|-----------------|----------|
| American Robin        | -0.00714        | 0.623416 |
| Dark-eyed Junco       | -0.0244         | 0.708896 |
| Lincoln's Sparrow     | -0.0556         | 0.051968 |
| Mountain Chickadee    | -0.00395        | 0.517419 |
| Ruby-crowned Kinglet  | -0.06249        | 0.022694 |
| White-crowned Sparrow | 0.0265          | 0.029702 |
| Wilson's Warbler      | 0.00921         | 0.189823 |
| Yellow-rumped Warbler | -0.0488         | 0.110447 |
| American Crow         | 0.0257          | 0.017931 |
| Northern Flicker      | -0.0112         | 0.013414 |
| Pine Grosbeak         | -0.0165         | 0.855016 |
| Steller's Jay         | -0.0208         | 0.79216  |

Table S15. Values of site-specific covariates used in occupancy models. Percent forest and shrub at 100-, 200-, and 300-meter scales are abbreviated to F100, F200, etc.

| Site | Elevation | Habitat | F100 | F200 | F300 | S100 | S200 | S300 | PC1water | CCU   | PC1inverts | InvertPb | PC1Pb/REE |
|------|-----------|---------|------|------|------|------|------|------|----------|-------|------------|----------|-----------|
| D1   | 3465      | Shrub   | 34.3 | 28.4 | 19.3 | 51.4 | 41.8 | 37.7 | -3.966   | 0.259 | -1.273     | 13.2     | 1.854     |
| D2   | 3421      | Forest  | 57.2 | 68.8 | 60.7 | 42.9 | 19.9 | 19   | -3.951   | 0.275 | 4.602      | 3.91     | -4.318    |
| D3   | 3359      | Shrub   | 48.6 | 61   | 74   | 51.4 | 39   | 25.6 | -3.941   | 0.197 | -0.531     | 12.6     | 0.840     |
| D4   | 3317      | Forest  | 57.2 | 62.4 | 66.5 | 40   | 29.1 | 19.9 | -3.903   | 0.262 | 2.872      | 13.3     | -2.603    |
| D5   | 3284      | Forest  | 88.6 | 92.2 | 94.3 | 8.6  | 4.3  | 2.2  | -3.873   | 0.229 | -2.104     | 30.4     | 2.387     |
| US1  | 3426      | Grass   | 22.9 | 44.7 | 50.6 | 22.9 | 28.4 | 22.8 | -1.058   | 9.37  | 2.790      | 21.4     | -2.643    |
| US2  | 3395      | Shrub   | 11.4 | 36.1 | 46.2 | 62.9 | 35.5 | 27.5 | -0.541   | 10.3  | 0.151      | 31.2     | -0.131    |
| US3  | 3366      | Shrub   | 42.8 | 39   | 47.5 | 25.7 | 22   | 15.5 | -0.025   | 11.3  | -2.489     | 41.0     | 2.380     |
| US4  | 3343      | Forest  | 25.7 | 37.5 | 38.6 | 34.3 | 24.8 | 16.1 | 5.928    | 26.4  | -3.404     | 35.0     | 3.846     |
| US5  | 3304      | Forest  | 100  | 100  | 95.8 | 0    | 0    | 1.3  | 5.928    | 26.4  | -3.404     | 35.0     | 3.846     |
| LS1  | 3222      | Shrub   | 45.7 | 79.4 | 88.3 | 54.3 | 20.6 | 11.7 | 0.029    | 8.37  | -4.725     | 23.3     | 3.680     |
| LS2  | 3199      | Forest  | 45.8 | 65.3 | 80.1 | 54.3 | 34.8 | 17.7 | -0.382   | 7.73  | -3.882     | 21.7     | 2.762     |
| LS3  | 3172      | Shrub   | 45.8 | 77.3 | 84.2 | 54.3 | 22.7 | 15.8 | -0.793   | 7.09  | -3.04      | 20.1     | 1.844     |
| LS4  | 3078      | Shrub   | 20   | 65.2 | 83.2 | 68.6 | 26.2 | 13   | -1.678   | 6.41  | -3.04      | 20.1     | 1.844     |
| LS5  | 3047      | Forest  | 100  | 100  | 98.6 | 0    | 0    | 1.3  | -2.563   | 5.73  | -3.04      | 20.1     | 1.844     |
| P1   | 3198      | Forest  | 68.5 | 75.2 | 84.5 | 8.6  | 4.3  | 3.2  | 7.421    | 28.6  | 6.420      | 3.08     | -6.058    |
| P2   | 3155      | Forest  | 100  | 92.1 | 91.5 | 0    | 7.8  | 6    | 2.624    | 15.7  | 4.751      | 6.63     | -4.722    |
| P3   | 3131      | Forest  | 54.3 | 76.6 | 85.2 | 45.7 | 23.4 | 14.9 | 2.552    | 15.6  | 3.082      | 10.2     | -3.386    |
| P4   | 3116      | Forest  | 100  | 89.3 | 94.9 | 0    | 10.6 | 5.1  | 2.480    | 15.5  | 1.413      | 13.7     | -2.05     |
| P5   | 3076      | Forest  | 100  | 100  | 100  | 0    | 0    | 0    | 2.480    | 15.5  | 1.413      | 13.7     | -2.05     |

Table S16. Values of survey-specific covariates used in occupancy models. V1, V2, and V3 refer to visits 1, 2, and 3.

| Site | Julian |    |    | Start Time |     |     | Start Temp |    |    | Wind |    |    | Sky |    |    | Noise |    |    |
|------|--------|----|----|------------|-----|-----|------------|----|----|------|----|----|-----|----|----|-------|----|----|
|      | V1     | V2 | V3 | V1         | V2  | V3  | V1         | V2 | V3 | V1   | V2 | V3 | V1  | V2 | V3 | V1    | V2 | V3 |
| D1   | 15     | 20 | 22 | 268        | 93  | 56  | 48         | 39 | 43 | 1    | 0  | 0  | 0   | 0  | 0  | 0     | 0  | 0  |
| D2   | 15     | 20 | 22 | 245        | 122 | 74  | 47         | 43 | 42 | 1    | 0  | 1  | 0   | 0  | 0  | 0     | 1  | 1  |
| D3   | 12     | 16 | 22 | 247        | 70  | 94  | 51         | 34 | 40 | 1    | 0  | 1  | 0   | 0  | 0  | 0     | 0  | 1  |
| D4   | 12     | 16 | 28 | 212        | 98  | 260 | 56         | 37 | 63 | 1    | 0  | 1  | 0   | 0  | 1  | 0     | 0  | 0  |
| D5   | 12     | 16 | 28 | 190        | 116 | 237 | 50         | 39 | 62 | 1    | 0  | 1  | 0   | 0  | 1  | 0     | 0  | 0  |
| US1  | 9      | 15 | 20 | 127        | 100 | 273 | 44         | 34 | 61 | 1    | 0  | 0  | 1   | 0  | 1  | 0     | 0  | 0  |
| US2  | 9      | 15 | 30 | 163        | 123 | 272 | 48         | 34 | 54 | 1    | 0  | 1  | 1   | 0  | 0  | 0     | 0  | 0  |
| US3  | 9      | 15 | 30 | 204        | 61  | 249 | 56         | 33 | 53 | 1    | 1  | 1  | 1   | 0  | 0  | 0     | 0  | 0  |
| US4  | 9      | 15 | 20 | 229        | 154 | 207 | 53         | 33 | 40 | 1    | 0  | 0  | 1   | 0  | 1  | 0     | 0  | 0  |
| US5  | 9      | 15 | 20 | 256        | 176 | 183 | 55         | 36 | 41 | 1    | 0  | 0  | 1   | 0  | 1  | 0     | 0  | 1  |
| LS1  | 12     | 22 | 28 | 151        | 156 | 211 | 39         | 40 | 56 | 0    | 0  | 0  | 0   | 0  | 1  | 1     | 1  | 1  |
| LS2  | 12     | 22 | 28 | 134        | 168 | 200 | 39         | 40 | 54 | 0    | 0  | 0  | 0   | 0  | 1  | 1     | 0  | 0  |
| LS3  | 12     | 16 | 22 | 106        | 168 | 183 | 34         | 37 | 43 | 1    | 1  | 0  | 0   | 0  | 1  | 0     | 0  | 0  |
| LS4  | 12     | 16 | 22 | 39         | 240 | 250 | 42         | 56 | 53 | 0    | 1  | 0  | 0   | 0  | 1  | 0     | 0  | 0  |
| LS5  | 16     | 22 | 28 | 258        | 227 | 176 | 57         | 53 | 53 | 1    | 1  | 1  | 0   | 1  | 1  | 1     | 1  | 1  |
| P1   | 28     | 30 | 30 | 141        | 50  | 59  | 48         | 37 | 37 | 0    | 0  | 0  | 1   | 2  | 2  | 0     | 0  | 0  |
| P2   | 28     | 30 | 30 | 111        | 76  | 85  | 44         | 37 | 37 | 0    | 0  | 0  | 1   | 1  | 1  | 0     | 1  | 1  |
| P3   | 28     | 30 | 30 | 88         | 105 | 114 | 42         | 37 | 38 | 1    | 0  | 0  | 1   | 1  | 1  | 1     | 1  | 1  |
| P4   | 28     | 30 | 30 | 162        | 133 | 142 | 52         | 40 | 41 | 0    | 0  | 0  | 1   | 1  | 1  | 0     | 1  | 1  |
| P5   | 28     | 30 | 30 | 55         | 157 | 166 | 43         | 42 | 43 | 0    | 0  | 0  | 1   | 1  | 1  | 1     | 1  | 1  |

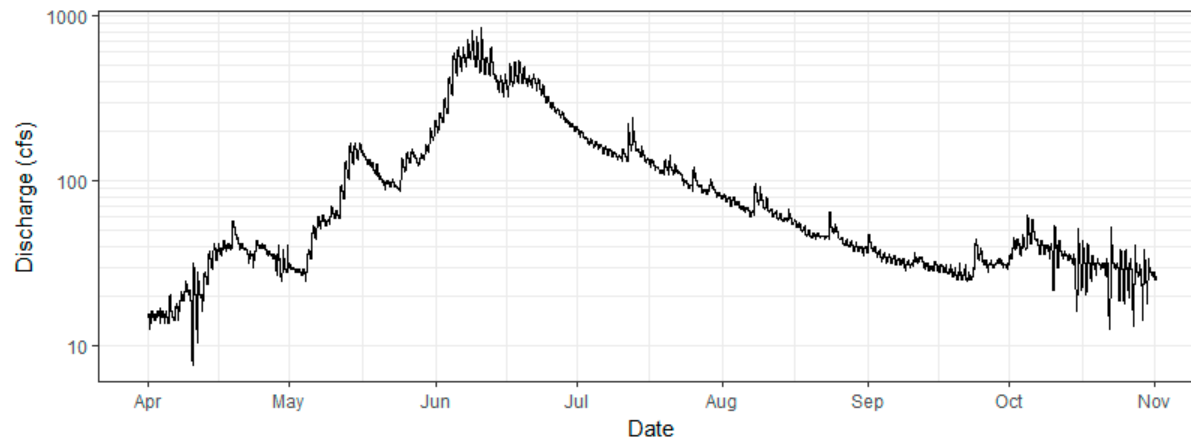

Figure S1. Streamflow in the Snake River watershed. This is the 2017 hydrograph as recorded at USGS gage 09047500, located downstream of the study area on the Snake River.
